# Supplementary material for: Assessment of the Interferon-Lambda-3 Polymorphism in the Antibody Response to COVID-19 in Older Adults Seropositive for CMV
Source: MDPI journal article supplement (doi:10.3390/vaccines11020480), 2023-02-18
Supplement: s1 [file s1]

**Table S1.** Results of neutralizing antibodies assessment for two different SARS-CoV-2 variants (Wuhan and Delta) in each volunteer enrolled in the present study on three different time points: MO (micro-outbreak), CURE, and VAC (vaccination). The range applied was 1:20 to 1:2560 and the values below 20 (<20) were considered negatives.

| Volunteer number | SARS-CoV-2 variant |       |       |           |       |       |
|------------------|--------------------|-------|-------|-----------|-------|-------|
|                  | VNT B (Wuhan)      |       |       | VNT Delta |       |       |
|                  | MO                 | CURE) | VAC   | MO        | CURE) | VAC   |
| 1                | 20                 | 40    | 20    | 20        | 20    | 20    |
| 2                | <20                | <20   | 20    | <20       | <20   | 20    |
| 3                | <20                | <20   | <20   | <20       | <20   | <20   |
| 4                | <20                | <20   | 80    | <20       | <20   | 20    |
| 5                | <20                | <20   | <20   | <20       | <20   | <20   |
| 6                | 80                 | 40    | 1280  | <20       | <20   | ≥2560 |
| 7                | <20                | <20   | -     | <20       | <20   | -     |
| 8                | <20                | <20   | <20   | <20       | <20   | <20   |
| 9                | <20                | <20   | <20   | <20       | <20   | <20   |
| 10               | <20                | <20   | <20   | <20       | <20   | <20   |
| 11               | <20                | <20   | <20   | <20       | <20   | <20   |
| 12               | <20                | 320   | ≥2560 | <20       | 80    | 1280  |
| 13               | <20                | <20   | <20   | <20       | <20   | <20   |
| 14               | <20                | <20   | <20   | <20       | <20   | <20   |
| 15               | <20                | <20   | -     | <20       | <20   | -     |
| 16               | -                  | <20   | 80    | -         | <20   | 80    |
| 17               | 640                | 160   | ≥2560 | 320       | 80    | 640   |
| 18               | <20                | 320   | 1280  | <20       | 80    | 640   |
| 19               | <20                | 320   | 160   | <20       | 80    | 40    |
| 20               | <20                | 160   | ≥2560 | <20       | 80    | 1280  |
| 21               | <20                | -     | <20   | <20       | -     | <20   |
| 22               | <20                | <20   | 320   | <20       | <20   | 320   |
| 23               | <20                | 40    | 40    | <20       | <20   | <20   |
| 24               | <20                | <20   | -     | <20       | <20   | -     |
| 25               | <20                | 40    | 20    | <20       | 20    | 20    |
